# Supplementary material
Source: PubMed Central journal article supplement (PMC7686909)

## Supplemental Methods

### Cytospin for cytology

50.10<sup>3</sup> differentiated cells from D6 to D20 were cytospun (Cytospin3, Shandon) onto glass slides (Matsunami). Cytological analysis was performed after May-Grünwald Giemsa (MGG) staining (Sigma) according to manufacturer's instruction.

### Immunoblots

Cells were harvested at one million per ml per condition, washed in 1X PBS and lysed on ice in RIPA buffer (Sigma) containing protease and phosphatase inhibitors cocktail (ThermoFisher). Lysates were gently sonicated, centrifuged and protein concentration was quantified using Bradford assay (Interchim). After standard procedures of SDS-polyacrylamide gel electrophoresis, nitrocellulose membrane transfer and 5% non-fat milk blocking, blotting was performed using 1/1000 diluted primary antibodies (references in **Suppl. Table 3**). Bound primary antibodies were detected using anti-mouse (Sigma) or anti-rabbit (ThermoFisher) horseradish peroxidase- conjugated secondary antibody. Revelation was performed by enhanced chemiluminescent substrate (ThermoFisher) and signals were visualized using Chemidoc Device (BioRad).

### RQ-PCR

Total RNA from fresh cells was isolated, treated with DNase I, using the RNeasy Mini Kit from Qiagen. RNA quantity was determined with the NanoDrop ND-1000 Spectrophotometer (Thermo Fisher Scientific). For each sample, 500 ng of RNA was subjected for reverse transcription reaction (Reverse Transcription Kit, ThermoFisher). Expression levels of GPX4 and GAPDH were measured by real time PCR using Taqman probes (ThermoFisher). For the gene expression ratios of GPX1 versus GAPDH housekeeping gene, real time PCR was performed by power SYBR green assay (ThermoFisher). Primer sequences are listed **Suppl. Table 4**. Experiments were realized in the Quant Studio 7 Detection Device (Applied Biosystems), including dissociation curves setting. The comparative C<sub>T</sub> method was used for quantification of gene expression.

### Imaging Flow Cytometry (IFC)

Enucleation was evaluated in Day18 erythroblasts cells on ImageStream<sup>®</sup>X Mark II (Amnis/Luminex) using INPIRE<sup>™</sup> software (200.1.388.0). 1.10<sup>6</sup> cells in 50µl 1X PBS were

stained with human Anti-GPA\_PE, AlexaFluor 488-conjugated Anti Phospho Myosin Light Chain, AlexaFluor 647-conjugated Cholera Toxin subunit b and Hoechst or DRAQ7. Cell analyses were performed on at least 10,000 cells at 60X magnification. Analysis was performed using IDEAS™ software (6.2.64.0). First, saturated, clipped and not focused events were gated out. Then, erythroblasts, reticulocytes and pyrenocytes were identified thanks to Hoechst and GPA stainings. Erythroblasts enucleation was evaluated on 'Delta Centroid XY\_M03\_CD235\_PE\_IntensityWeighted\_M01\_Hoechst' vs 'Aspect Ratio\_M04'. The precise gating strategy is explained **Suppl. Fig 6**. The graphical definitions of the gating strategy used to evaluate precisely the enucleation process are detailed below:

Focused = graphical region on All

NonSat[xx] = graphical region on All, for each xx collected channel

Uncut = graphical region on All

DNA+ = graphical region on Events

SingleNucleus = graphical region on DNA+

CD235+\_for Ery = graphical region on Mono-Nucleated

CD235+\_for Ret = graphical region on DNA-

SingleRet = graphical region on CD235+\_for Ret

Pyr = graphical region on Mono-Nucleated

Ery = graphical region on Mono-Nucleated

Combined populations:

Events = NoSat&Uncut&Focused

DNA- = Events And Not DNA+ & Events

MonoNucleated = SingleNucleus & DNA+ & Events

Erythroblasts = CD235+\_forEry & Mono-Nucleated And Ery

Reticulocytes = SingleRet & CD235+\_forRet & DNA-

Pyrenocytes = Pyr & Mono-Nucleated

### **Neutral lipid quantification**

For each condition, 10<sup>6</sup> cells were frozen at -80°C then sent to MetaToul Lipidomique Core Facility (Toulouse, France). Samples were homogenized, extracted with ISTD by the Bligh and Dyer method, final extracts were solubilized in 20µL ethyl acetate and analyzed by gas chromatography with flame-ionization detection (Focus Finningan, Thermo Scientific) using

Zebron ZB-5ms column (Phenomenex). Quantification was relative using internal calibration (Stigmasterol, Cholesterol ester C17, TG 19).

**Suppl. table 1: Sequences of the 3 GPX4 ShRNA**

| SIGMA Sh Rna Collection-TRC | Sh sequences                                                 | Validated                           |
|-----------------------------|--------------------------------------------------------------|-------------------------------------|
| TRCN0000046249 SH1          | CCGGGTGAGGCAAGACCGAAGTAAACTCGAGTTTACTTCGGTCTTGCCTCACATTTTTG  | <i>Cell.2014. Stockwell and al.</i> |
| TRCN0000304065 SH2          | CCGGTCATGACGGCCTGCCTGCAAACCTCGAGTTTGCAGGCAGGCCGTCATGATTTTTG  |                                     |
| TRCN0000046251 SH3          | CCGGGTGGATGAAGATCCAACCCAACCTCGAGTTGGGTTGGATCTTCATCCACATTTTTG |                                     |

**Suppl. table 2: List of antibodies used for FCM**

| D1 to D6                                                                          | D7 to D14          | D14 to D20                                                        | D16 to D20                                         |
|-----------------------------------------------------------------------------------|--------------------|-------------------------------------------------------------------|----------------------------------------------------|
| CD34PE (AC136)<br>CD36Vioblue (REA760)<br>CD71FITC (REA902)<br>CD235aAPC (REA175) | CD71PE<br>CD235APC | CD71FITC<br>or BAND3FITC* (BRIC6)<br>CD235PE<br>CD49dAPC (REA545) | HOECHST,<br>CD71FITC<br>or BAND3FITC*,<br>CD235APC |

All conjugated antibodies and corresponding isotypes were supplied from Miltenyi Biotec, excepted \*BAND3 FITC purchased from IGBRL. Hoechst was supplied from Sigma.

**Suppl. table 3: List of antibodies used for immunoblots**

| Antibodies Targets                    | Antibodies species | References               |
|---------------------------------------|--------------------|--------------------------|
| Anti-human GPX4                       | rabbit             | Abcam (25066)            |
| Anti-human GPX1                       | rabbit             | Thermofisher (PA5-26323) |
| Anti-human Phospho Myosin Light Chain | mouse              | Cell signaling (3675)    |
| Anti-human Myosin Light Chain         | rabbit             | Cell signaling (8505)    |
| Anti-human Catalase                   | mouse              | Santacruz (271242)       |
| Anti-human GAPDH                      | mouse              | Santacruz (32233)        |

**Suppl. table 4: List of primers for RQ-PCR**

GPX4 and GAPDH primer pairs were designed to span an exon–exon boundary using Primer Blast tool, purchased by Eurogentec and validated for their specificity.

5'->3'

|                                                 |                                                 |
|-------------------------------------------------|-------------------------------------------------|
| <b><i>GPX4 FOR</i></b><br>GCCTTTGCCGCCTACTGAA   | <b><i>GPX4 REV</i></b><br>TCCTTGGCGGAAAAC TCGTG |
| <b><i>GAPDH FOR</i></b><br>AAGGTGAAGGTCGGAGTCAA | <b><i>GAPDH REV</i></b><br>CTTGACGGTGCCATGGAATT |

## Legends to supplemental figures

### Supplemental figure 1

**A.** Histogram showing *GPX4* gene expression at RNA level at different steps of *in vitro* erythropoiesis from Day2 (D2) to D17 (n=3).

**B.** Left: representative *GPX4* immunoblot at different erythroid stages. *GAPDH* was used as internal control. Right: immunoblot quantification of the *GPX4/GAPDH* ratio from two independent experiments.

**C.** Left: representative *GPX4* immunoblot, at D14 obtained from DMSO and 1 $\mu$ M RSL3-treated erythroblasts. *GPX1* Western Blot was also performed and showed no difference between the two conditions. Right: quantification of the *GPX4/GAPDH* ratio from three independent experiments. DMSO vs. RSL3,  $p=0.01$

**D.** Left: representative *GPX4* immunoblot, at D18, obtained from DMSO and 1 $\mu$ M RSL3-treated erythroblasts. Right: quantification from three independent experiments. DMSO vs. RSL3,  $p<0.05$ .

\* $p < 0.05$ ; \*\* $p < 0.001$ ; \*\*\* $p < 0.0001$ . Error bars are SEM.

### Supplemental figure 2

**A.** Dot plots from a representative *in vitro* differentiation using our protocol, showing the loss of CD34, gain of CD36 from D0 to D5, the gain of GPA and progressive decrease in CD71 expression from D7 to D15 and the enucleation step at D18 with a population of GPA<sup>High</sup>/Band3<sup>+</sup>/Hoechst<sup>-</sup> (reticulocytes) or GPA<sup>High</sup>/Band3<sup>+</sup>/Hoechst<sup>+</sup> (OrthoE) cells and a population of GPA<sup>Int</sup>/Hoechst<sup>+</sup>/Band3<sup>Low</sup> cells (pyrenocytes).

**B.** IFC quantification of orthoE and enucleated GPA<sup>+</sup>/Hoechst<sup>-</sup> reticulocytes after 1 $\mu$ M RSL3 or DMSO treatments (n=5). Gating strategy is shown in Suppl. Fig 6. Percent of enucleated cells DMSO vs. RSL3: 71  $\pm$  8% vs. 38  $\pm$  10%,  $p < 0.01$ .

### Supplemental figure 3

**A.** Histogram showing *GPX4* gene expression at RNA level, using *GAPDH* as internal control, after lentiviral transduction of erythroblasts with scramble (SCR) shRNA as a control and 3 different *GPX4*-specific shRNA: SH1, SH2 and SH3 (n=3). *GPX4/GAPDH* ratio at RNA level were 0.35  $\pm$  0.03, 0.75  $\pm$  0.03 and 0.37  $\pm$  0.04 for SH1, SH2 and SH3 respectively. DMSO vs. SH1:  $p < 0.0001$ , vs. SH2:  $p < 0.001$ , vs. SH3:  $p < 0.0001$ .

**B.** Left: Histogram showing GPX4 expression at protein level, using GAPDH as internal control, after lentiviral transduction as described above (n=3). GPX4/GAPDH ratio were  $0.22 \pm 0.02$ ,  $0.42 \pm 0.03$  and  $0.20 \pm 0.04$  for SH1, SH2 and SH3 respectively. DMSO vs. SH1:  $p < .0001$ , vs. SH2:  $p < .0001$ , vs. SH3:  $p < .0001$ . Right: Representative GPX4 immunoblot from one of the three independent experiments.

**C.** GPX4 knockdown did not impact erythroid differentiation until OrthoE stage: dot plots are obtained from one representative experiment showing a similar expression pattern of erythroid markers at D5, D9 and D18 between shSCR and shGPX4-transduced cells (the figure shows data obtained with SH1 as an example) (n=3).

#### **Supplemental figure 4**

**A.** Sensitivity of three different cell lines after 12h RSL3 exposure in terms of lipid peroxidation assessed by C11-BODIPY<sup>581/591</sup> staining. UT7-cells expressed low level of C11-BODIPY<sup>581/591</sup> ( $19.5 \pm 2\%$ ) in comparison to the U937 myeloid cells ( $38 \pm 2\%$ ) and the lymphoid cells RAMOS ( $52 \pm 3\%$ ) despite a 10-fold higher dose ( $1\mu\text{M}$  vs.  $0.1\mu\text{M}$ ).

**B.** Ferroptosis-indirect inducer, Erastin, did not impact enucleation at D20 (n=3). Percent of enucleated D20 cells:  $71 \pm 6\%$  vs.  $67 \pm 6\%$ ,  $p = \text{NS}$ .

#### **Supplemental figure 5**

**A.** Scheme illustrating the crosstalk between cholesterol synthesis and GPX4 translation in cells. Isopentenyl pyrophosphate (IPP) is an intermediary component of the mevalonate pathway and is also necessary for Isopentenyl SEC-tRNA synthesis and translation of selenoproteins such as GPX4.

**B.** D20 erythroblast enucleation was significantly reduced after cell exposure to  $2\mu\text{M}$  Simvastatin, an inhibitor of HMG-CoA reductase (n=3). Percent of enucleated cells DMSO vs. Simvastatin:  $67 \pm 4$  vs.  $38 \pm 5\%$ ,  $p < .001$

#### **Supplemental figure 6**

**A.** Schematic representation of the gating strategy for enucleation study by imaging flow cytometry. The different gates were defined to (i) identify pyrenocytes (Pyr), reticulocytes (Ret) and erythroblasts based on GPA (CD235)-PE and Hoechst staining (upper) and (ii) within the erythroblast gate, to identify successive steps in nucleus polarization (Init) and nucleus extrusion (Enuc 1,2,3, this latter corresponding to nearly completed enucleation) based on "deltacentroid in GPA<sup>+</sup>/Hoechst<sup>+</sup> cells vs. aspect ratio brightfield" dot plots (lower).

**B.** Representative images obtained from another experiment using DRAQ7 as nuclear staining and GPA, showing the progressive extrusion of the nuclei during the progression all along these defined gates, ENUC3 corresponding to the end of the enucleation process.

### **Supplemental figure 7**

Representative immunofluorescence image of DMSO and RSL3-treated cells using Tubulin and CTB in association with DAPI, showing a strong CTB localization at cleavage furrow in DMSO-treated cells while the staining was more diffuse and weaker in 1 $\mu$ M RSL3-treated cells.

### **Supplemental figure 8**

**A.** Representative images obtained with IFC using DRAQ7 (for nucleus staining), GPA (for membrane staining) and pMRLC between DMSO and 1 $\mu$ M RSL3 treated cells (n=1). The pMRLC fluorescence intensity was decreased in RSL3 condition in comparison to DMSO, confirming the data obtained by FCM and immunoblot.

**B.** Dot plots obtained from IFC in the Init and ENUC1 gates showing:

- Right: an identical GPA intensity in DMSO (black dots) and 1 $\mu$ M RSL3-treated (red dots)-cells (Y-axis), but a decreased total pMRLC signal intensity (X-axis)
- Left: an identical mean intensity on the Y-axis between these two conditions. The Y-axis corresponds to the concentration ratio of pMRLC at the interface between the nucleus and the cytoplasm, *i.e* the relative proportion of the total pMRLC signal located at a mask defined as the nucleus-cytoplasm junction.

# Suppl. Figure 1

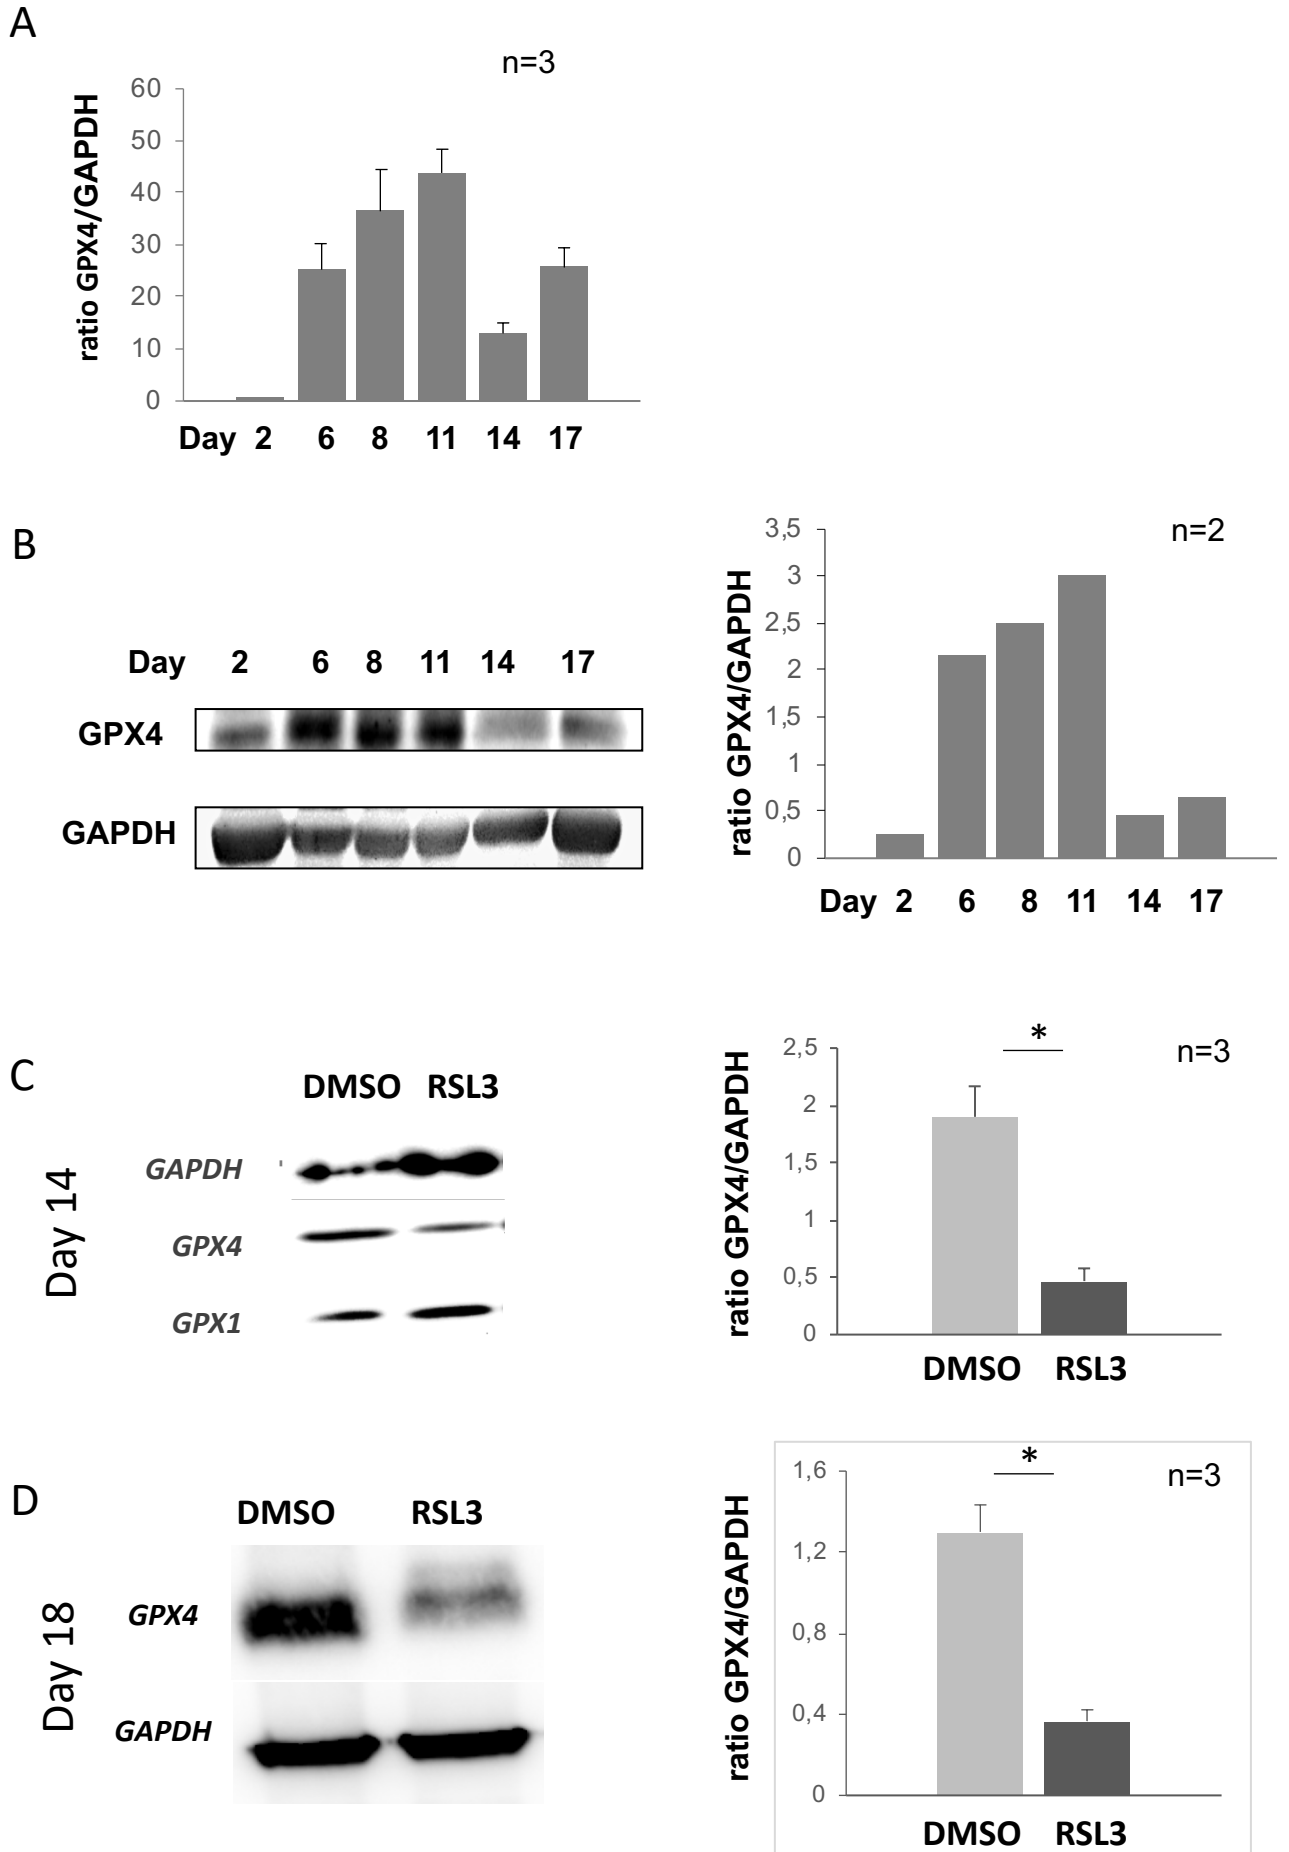



# Suppl. Figure 2

A

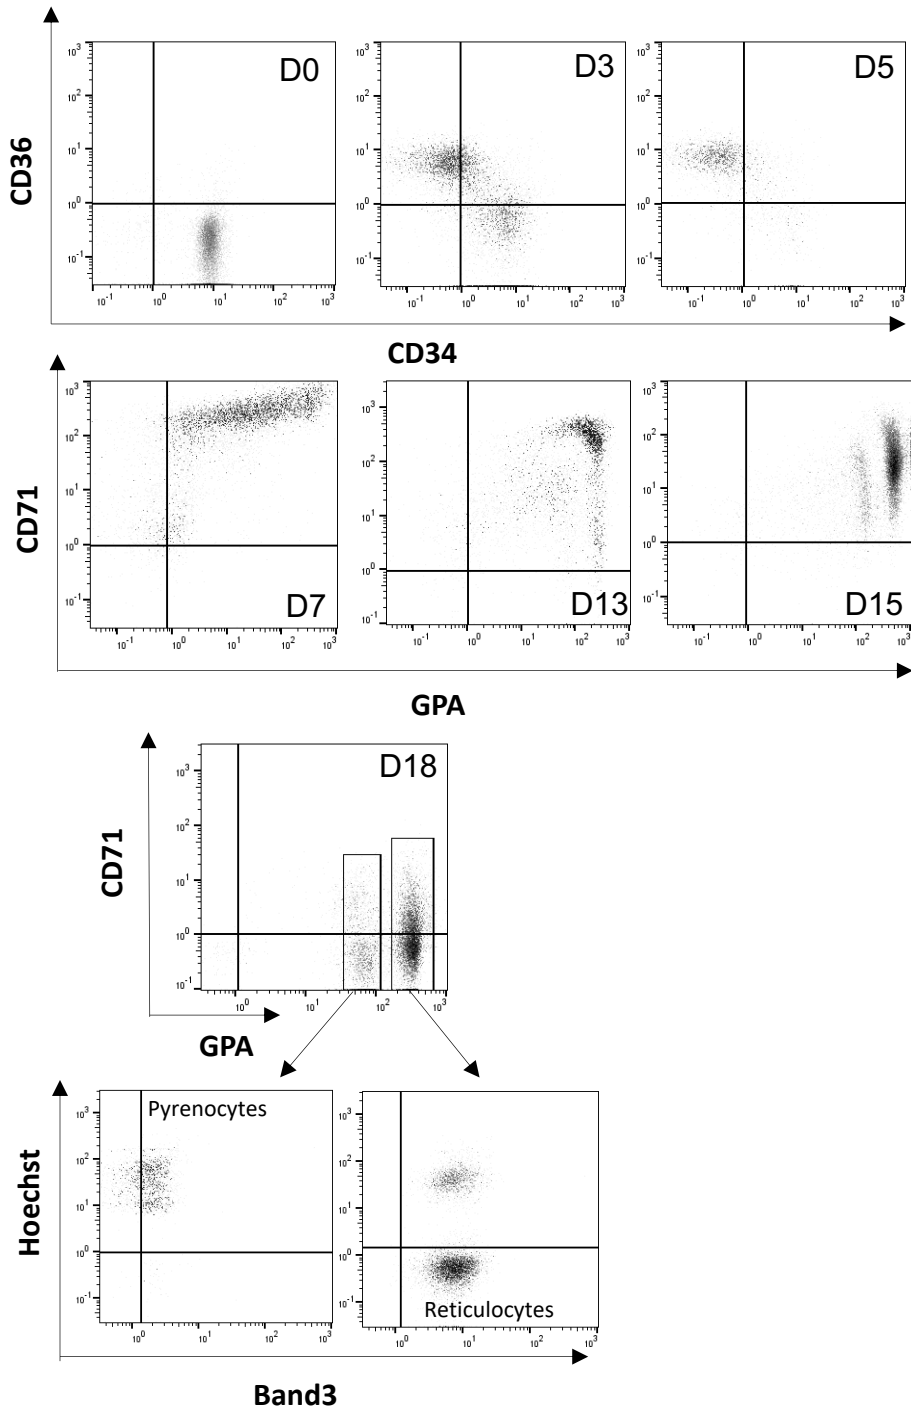

B

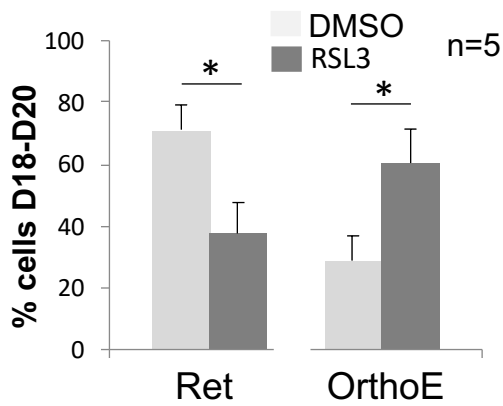

# Suppl. Figure 3

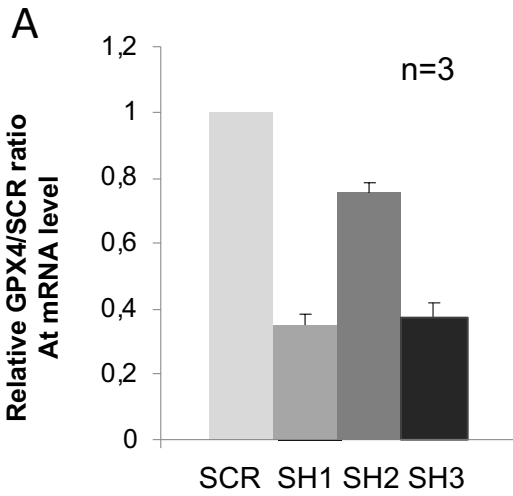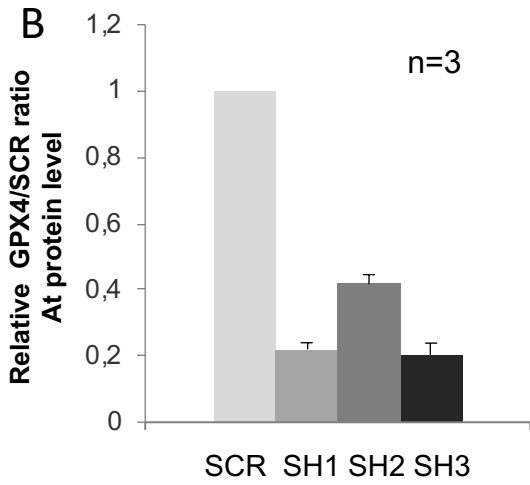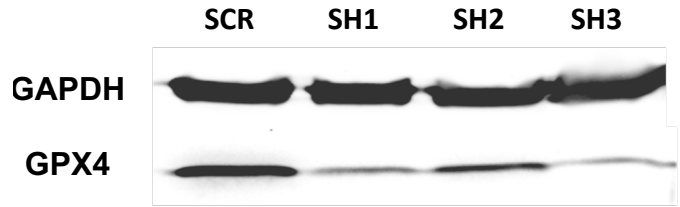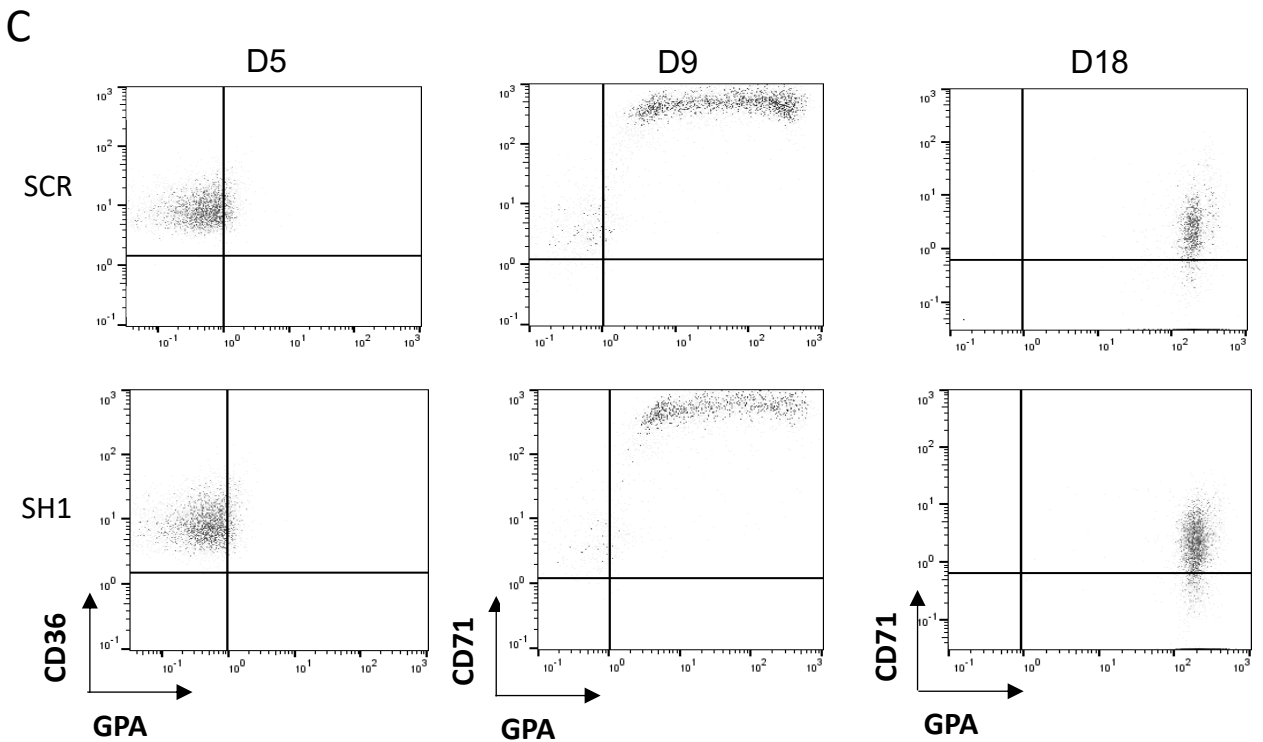

# Suppl. Figure 4

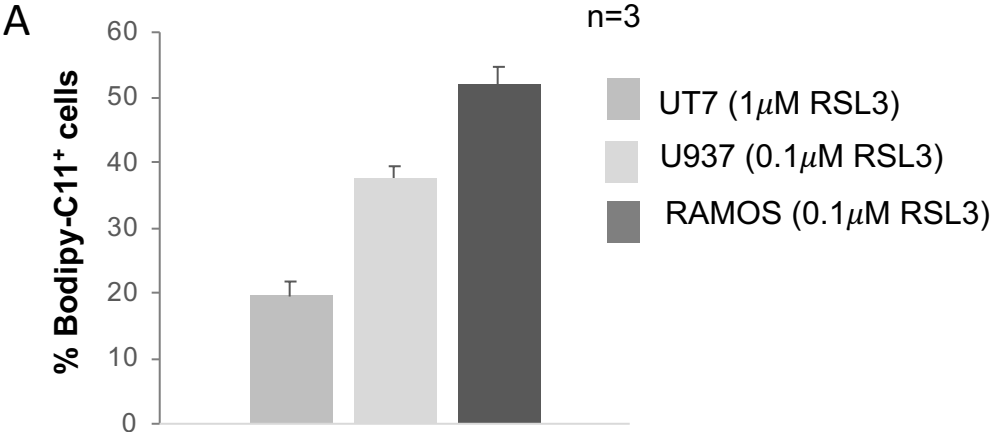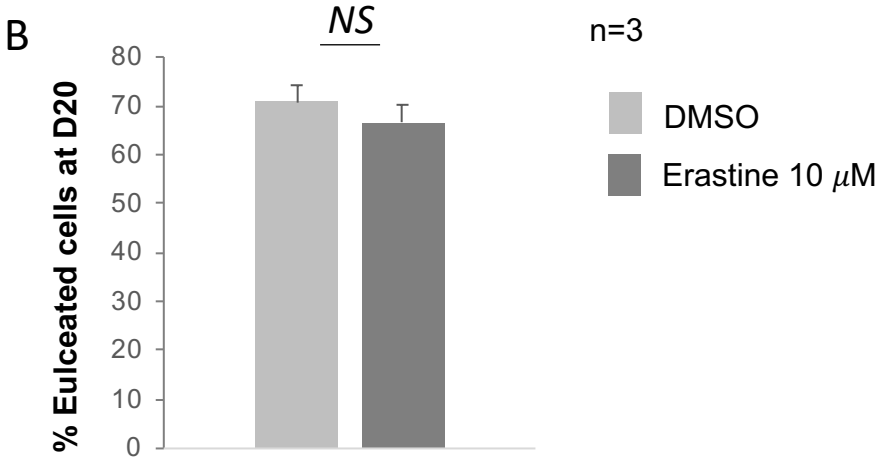

# Suppl. Figure 5

A

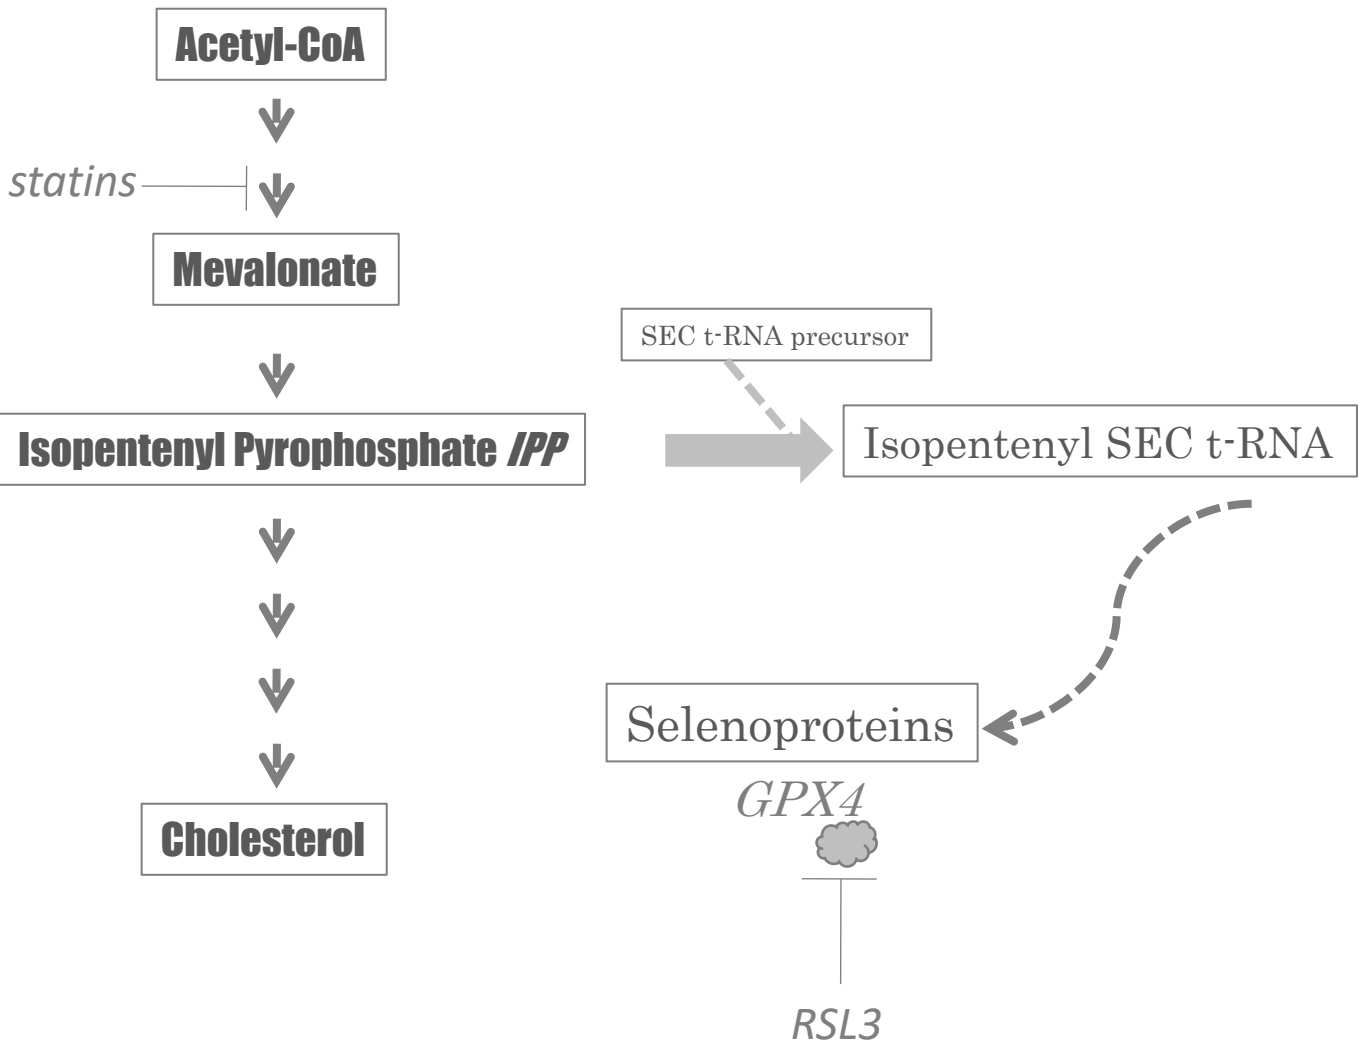

B

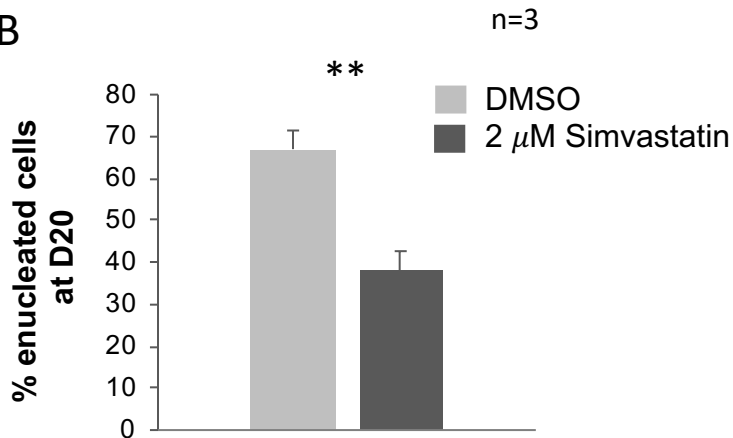

# Suppl. Figure 6

A

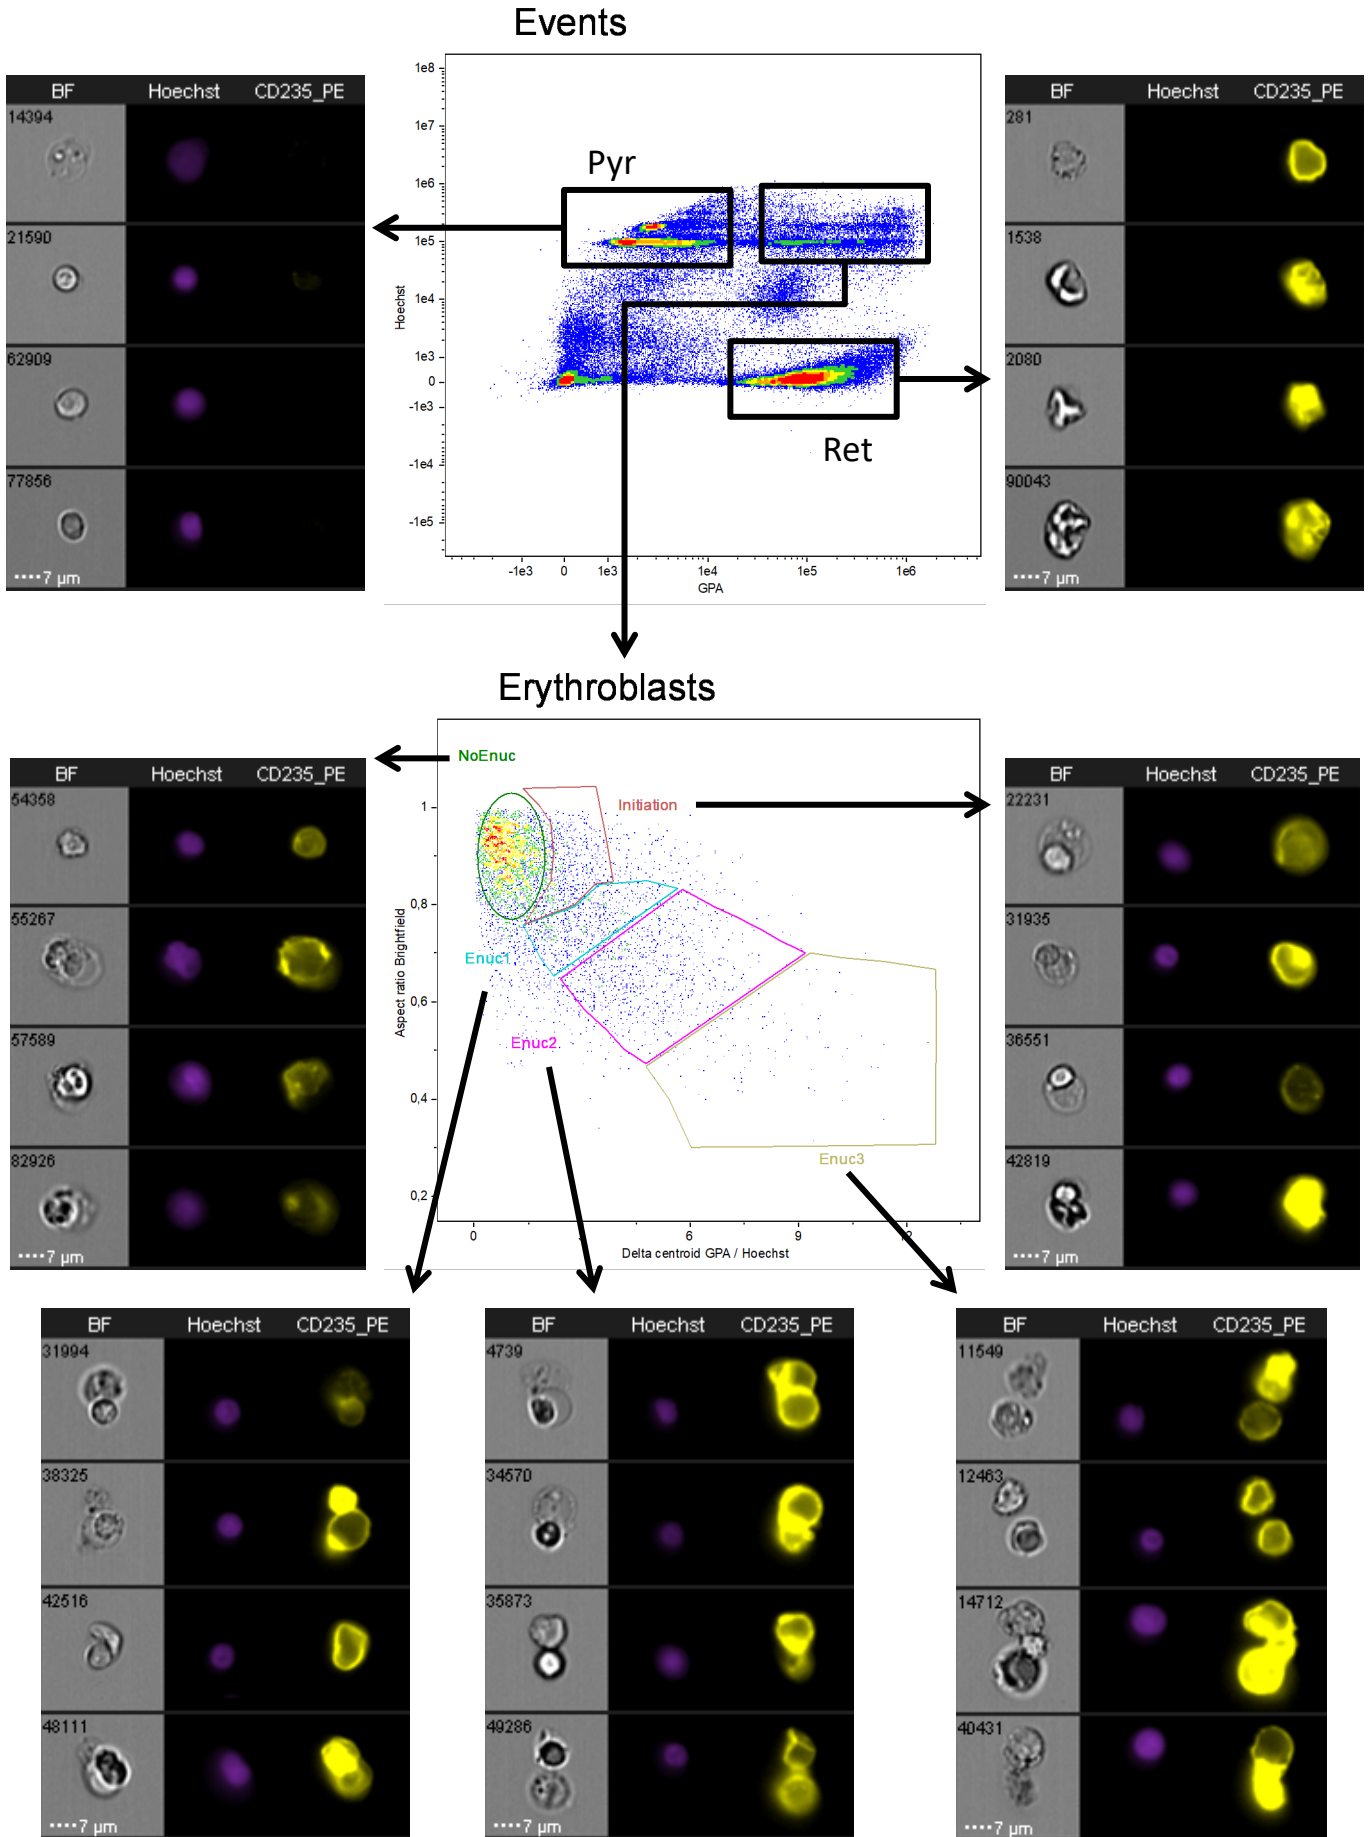

**Suppl. Figure 6**

**B**

GPA  
Brightfield  
DRAQ7

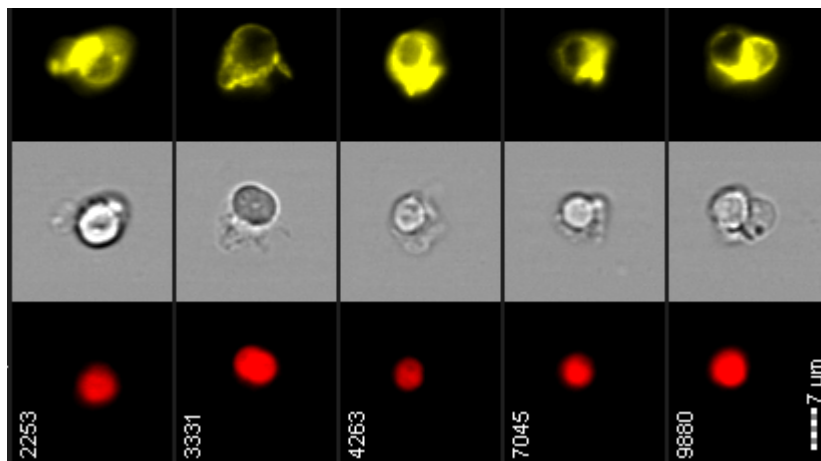

**Init**

GPA  
Brightfield  
DRAQ7

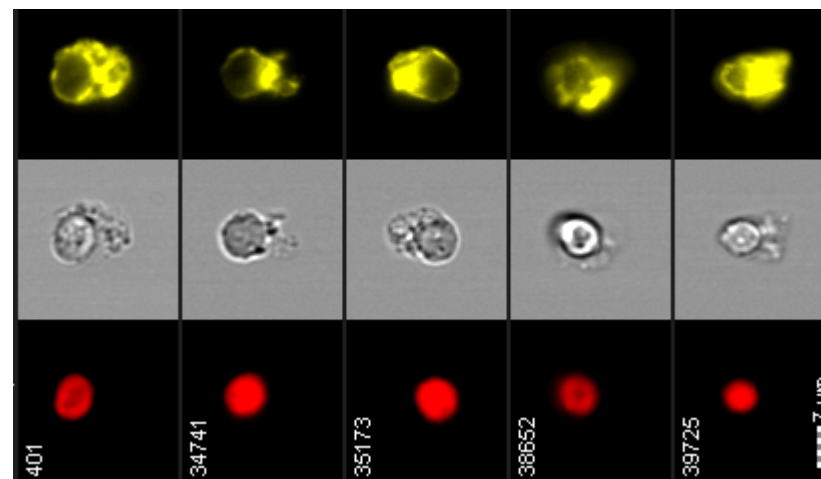

**Enuc1**

GPA  
Brightfield  
DRAQ7

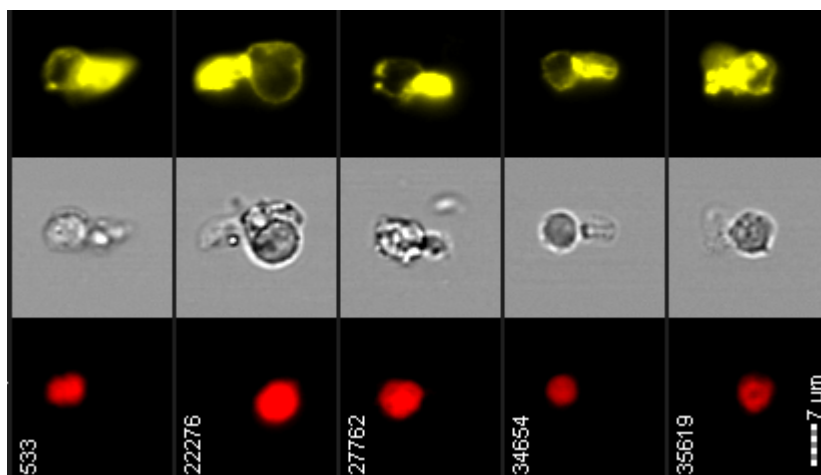

**Enuc2**

GPA  
Brightfield  
DRAQ7

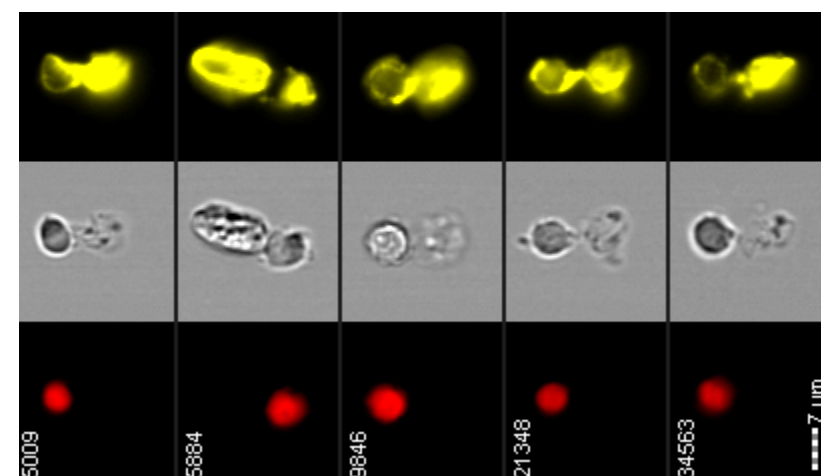

**Enuc3**

# Suppl. Figure 7

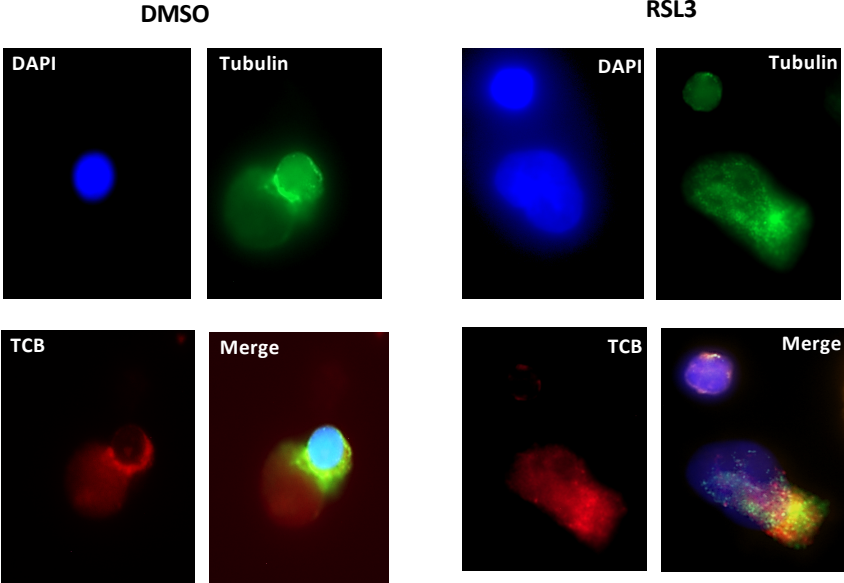

# Suppl. Figure 8

A

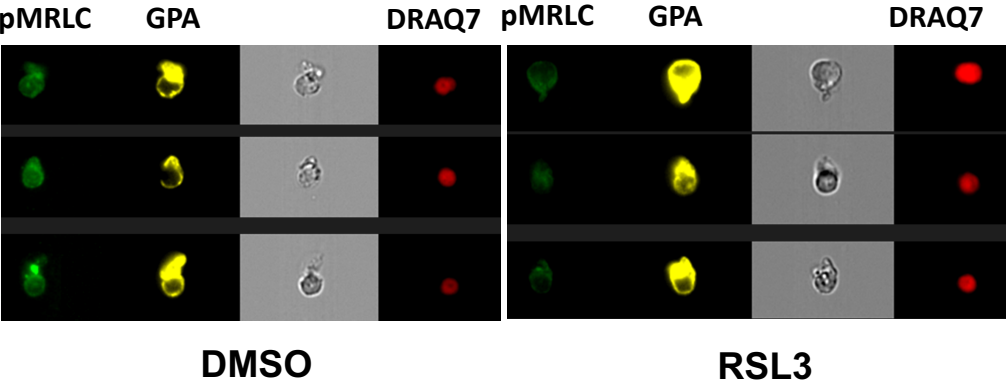

B

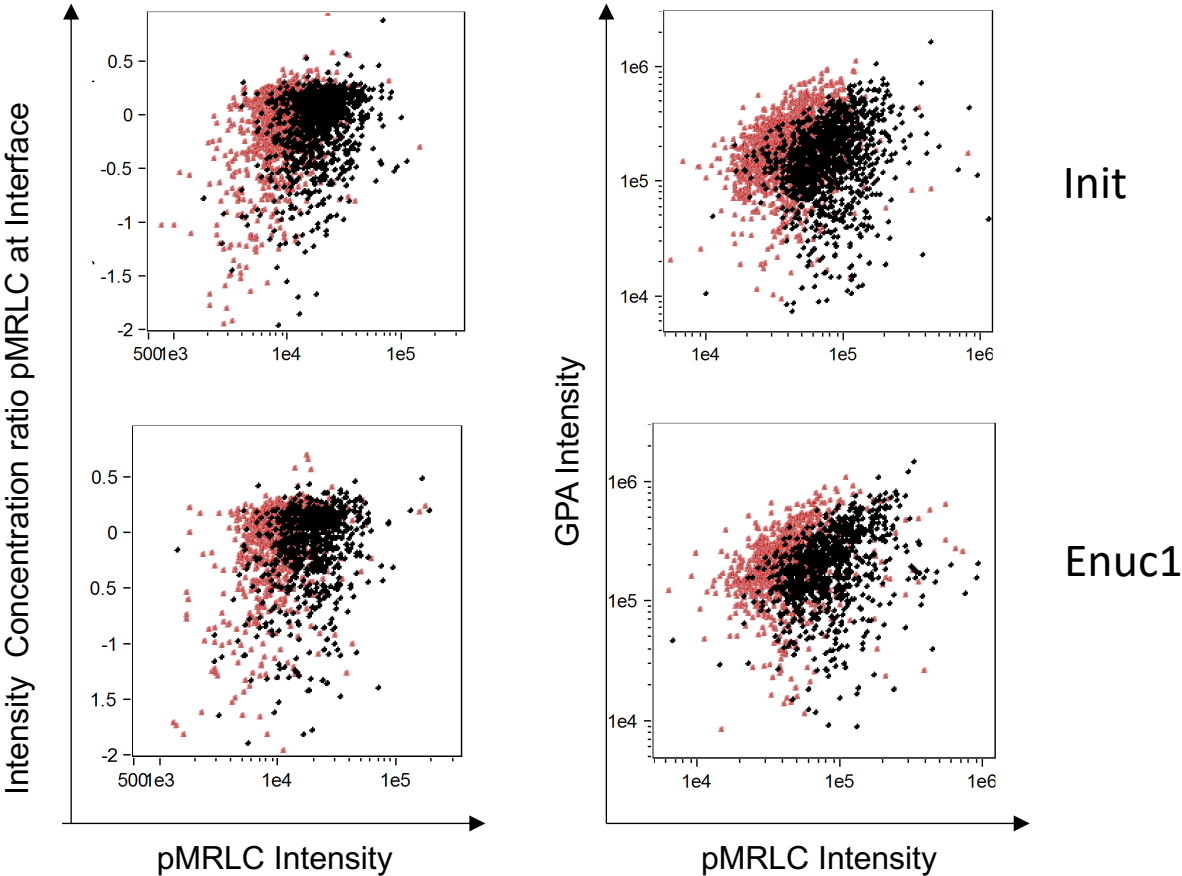

Supplement: advancesADV2020003100R1-suppl1.pdf [file advancesADV2020003100R1-suppl1.pdf]
